# Supplementary material for: From circRNAs to fusion circRNAs in hematological malignancies
Source: PubMed Central journal article supplement (PMC8663548; doi:10.1172/jci.insight.151513), 2021-11-08
Supplement: jciinsight-6-151513-s071.pdf [file jciinsight-6-151513-s071.pdf]

**Supplemental Table 1. CircRNAs involved in hematological diseases**

| Disease      | circRNA                      | Host gene        | Putative targets and mechanism                                                                        | Expression                                                             | Phenotype                                                                                                          | Clinical relevance                                  | Refs     | Databases        |
|--------------|------------------------------|------------------|-------------------------------------------------------------------------------------------------------|------------------------------------------------------------------------|--------------------------------------------------------------------------------------------------------------------|-----------------------------------------------------|----------|------------------|
| AML          | circ-0004136                 | KCNQ5            | miR-142                                                                                               | Up                                                                     | Cell proliferation or growth                                                                                       | Potential therapeutic target                        | 100      | circad           |
|              | circ-0009910                 | MFN2             | miR-20a-5p                                                                                            | Up                                                                     | Cell proliferation                                                                                                 | Potential therapeutic target                        | 99       | circBase         |
|              | circ-100290                  | SLC30A7          | miR-203/Ras                                                                                           | Up                                                                     | Cell proliferation, reduced apoptosis                                                                              | Potential therapeutic target                        | 102      | circad           |
|              | circ-0004277                 | WDR37            |                                                                                                       | Down                                                                   | Decreased in refractory patients                                                                                   | Relapse biomarker                                   | 95       | circad, circBase |
|              | circ-0001947                 | AFF2             | miR-399-5p/CREBRF                                                                                     | Down                                                                   | Curbed cell proliferation                                                                                          | Restoration as treatment strategy                   | 101, 102 | circad, circBase |
|              | circ-0121582                 | GSK3B            | miR-224/SK3 $\beta$                                                                                   | Down                                                                   | Suppressed growth                                                                                                  | Restoration as treatment strategy                   | 105      | circBase         |
|              | circANAPC7<br>circ-101141    | ANAPC7           | miR-181                                                                                               | Up                                                                     | Promotes tumorigenic                                                                                               | Biomarker to monitor disease condition              | 94       | circbase, circad |
|              | circ-0075001                 | NPM1             |                                                                                                       |                                                                        | Correlates with NPM1 expression level                                                                              | Potential biomarker for subgroup identification     | 96       | circad, circBase |
|              | circDLEU2<br>circ-0000488    | DLEU2            | miR-496/PRKACB                                                                                        | Up                                                                     | Stimulates cell proliferation                                                                                      | Potential therapeutic target                        | 103      | circad, circBase |
|              | circPAN3<br>hsa_circ_0100181 | PAN3             | miR153-5p, miR183-5p                                                                                  | Down                                                                   | Decreases the antiapoptotic X-linked inhibitor of apoptosis protein expression and mediates doxorubicin resistance | Biomarker of resistance to doxorubicin              | 97       | circad, circBase |
| circMYBL2    | MYBL2                        | RBP PTBP1        | Up in patients with FLT3-ITD mutations                                                                | Impairs proliferation and overcomes acquired resistance to FLT3 kinase | Biomarker for FLT3-IDT-mutated patients, potential therapeutic target                                              | 98                                                  | circBase |                  |
| circ-0000370 | FLI1                         | miR-1299/S100A7A | Abnormally expressed in FLT3-ITD-positive cells                                                       | Promotes viability and suppresses apoptosis                            | Potential therapeutic target for FLT3-IDT-positive patients                                                        | 106                                                 | circBase |                  |
| circFBXW7    | FBXW7                        |                  | Down                                                                                                  | Tumor suppressor                                                       | Restoration as treatment strategy                                                                                  | 107                                                 | NA       |                  |
| CLL          | circ-0132266                 | MTO1             | miR-337-3p/PML                                                                                        | Down                                                                   | Influence on cell viability                                                                                        | Biomarker, restoration as treatment strategy        | 108      | circBase         |
|              | circ-CBFB<br>circ-0000707    | CBFB             | miR-607/FZD3/Wnt/ $\beta$ -catenin                                                                    | Up                                                                     | Promotes proliferation and inhibits apoptosis                                                                      | Potential therapeutic target                        | 109      | circad, circBase |
|              | circRPL15<br>circ-0064574    | RPL15            | miR-146b-3p/RAF1 axis                                                                                 | Up                                                                     | Increases cell viability                                                                                           | Prognosis biomarker (detectable in plasma)          | 110      | circBase         |
| CML          | circHIPK3<br>circ-0000284    | HIPK3            | miR-124/B4GAL1/NF- $\kappa$ B                                                                         | Up                                                                     | Promotes cell proliferation                                                                                        | Prognosis biomarker (detectable in PBMCs and serum) | 90       | circBase         |
|              | hsa_circ_0080145             | TNS3             | miR-29b/ABL1, BCR-ABL, miR-326/PPF1A1 axis                                                            | Up                                                                     | Protumor, enhances imatinib resistance                                                                             | Resistance biomarker                                | 111, 112 | circad, circBase |
|              | circ-100053                  | MFN2             |                                                                                                       | Up in resistance to imatinib                                           |                                                                                                                    | Resistance biomarker                                | 113      |                  |
| ALL          | circPVT1<br>circ-0001821     | PVT1             | miR-let-7, miR-125/c-Myc, Bcl-2                                                                       | Up                                                                     | Induces cell proliferation, inhibits apoptosis                                                                     | Potential therapeutic target                        | 115      | circad, circBase |
|              | circZNF609                   | ZNF609           | miR-181a-5p, miR-125a-5p (putative targets)                                                           | Up in immature T-ALL                                                   | Promotes T cell proliferation                                                                                      | Potential therapeutic target                        | 46       | NA               |
|              | circAF4                      | AF4              | miR-128-3p/MLL-AF4                                                                                    | Up                                                                     | Promotes leukemogenesis in vitro and in vivo                                                                       | Potential therapeutic target                        | 127      | NA               |
|              | circPAX5                     | PAX5             | miR-124 (putative target)                                                                             | Up                                                                     |                                                                                                                    |                                                     | 114      | NA               |
| DLBCL        | circAPC<br>circ-0127621      | APC              | miR-888/APC, TET1/APC, inhibits Wnt/ $\beta$ -catenin                                                 | Down                                                                   | Inhibits proliferation                                                                                             | Circulating biomarker                               | 122      | circBase         |
|              | circIKZF3                    | IKZF3            |                                                                                                       | Up                                                                     |                                                                                                                    |                                                     | 62       | NA               |
| MCL          | circCDYL                     | CDYL             | hsa-miR-129-5p, hsa-miR-3163, hsa-miR-4662a-5p, hsa-miR-101-3p, and hsa-miR-186-5 (potential targets) | Up                                                                     | Promotes cell proliferation                                                                                        | Diagnosis biomarker                                 | 121      |                  |
| T-LBL        | circLAMP1<br>circ-101303     | LAMP1            | miR-615-5p/DDR2                                                                                       | Up                                                                     | Promotes cell proliferation, inhibits apoptosis                                                                    | Potential therapeutic target                        | 123      | NA               |
|              | circSMARCA5                  | SMARCA5          | miR-767-5p                                                                                            | Down                                                                   | Inhibits proliferation and promotes apoptosis                                                                      | Restoration as treatment strategy                   | 117      | NA               |
| MM           | circPTK2<br>circ-0005273     | PTK2             | miR-1298-5p                                                                                           | Up                                                                     | Promotes tumor progression                                                                                         | Potential therapeutic target                        | 119      | circad, circBase |
|              | circAFF2                     | AFF2             | miR-638                                                                                               | Down                                                                   | Tumor suppressor                                                                                                   | Diagnosis and prognosis biomarker                   | 119      | circad, circBase |
|              | hsa_circ_0007841             | SEC61A1          | ABCG2                                                                                                 | Up                                                                     | Induces chemotherapy resistance                                                                                    | Biomarker for drug resistance                       | 118      | circBase         |
|              | hsa_circ_0000190             | CNIH4            | miR-767-5p/MAPK4                                                                                      | Down                                                                   | Inhibits cell viability and proliferation and induces apoptosis                                                    | Restoration as treatment strategy                   | 120      | circad, circBase |
|              | circCDYL                     | CDYL             | miR-1180/YAP                                                                                          | Up                                                                     | Facilitates MM progression                                                                                         | Biomarker, potential therapeutic target             | 121      | NA               |

AML, acute myeloid leukemia; CLL, chronic lymphocytic leukemia; CML, chronic myeloid leukemia; ALL, acute lymphoblastic leukemia; DLBCL, diffuse large B cell lymphoma; MCL, mantle cell lymphoma; T-LBL, T cell lymphoblastic lymphoma; MM, multiple myeloma.
